## 1 **Addressing the looming identity crisis in single cell RNA-seq**

2

3 Megan Crow, Anirban Paul, Sara Ballouz, Z. Josh Huang, Jesse Gillis\*

4 Cold Spring Harbor Laboratory, One Bungtown Road, Cold Spring Harbor, NY 11724, USA

5 [mcrow@cshl.edu](mailto:mcrow@cshl.edu), [paula@cshl.edu](mailto:paula@cshl.edu), [sballouz@cshl.edu](mailto:sballouz@cshl.edu), [huangj@cshl.edu](mailto:huangj@cshl.edu), [jgillis@cshl.edu](mailto:jgillis@cshl.edu)

6 \*corresponding author

### 7 **Abstract**

8 Single cell RNA-sequencing technology (scRNA-seq) provides a new avenue to discover and  
9 characterize cell types, but the experiment-specific technical biases and analytic variability  
10 inherent to current pipelines may undermine the replicability of these studies. Meta-analysis of  
11 rapidly accumulating data is further hampered by the use of *ad hoc* naming conventions. Here  
12 we demonstrate our replication framework, MetaNeighbor, that allows researchers to quantify  
13 the degree to which cell types replicate across datasets, and to rapidly identify clusters with high  
14 similarity for further testing. We first measure the replicability of neuronal identity by comparing  
15 more than 13 thousand individual scRNA-seq transcriptomes, sampling with high specificity  
16 from within the data to define a range of robust practices. We then assess cross-dataset  
17 evidence for novel cortical interneuron subtypes identified by scRNA-seq and find that 24/45  
18 cortical interneuron subtypes have evidence of replication in at least one other study. Identifying  
19 these putative replicates allows us to re-analyze the data for differential expression and provide  
20 lists of robust candidate marker genes. Across tasks we find that large sets of variably  
21 expressed genes can identify replicable cell types and subtypes with high accuracy, suggesting  
22 a general route forward for large-scale evaluation of scRNA-seq data.

### 23 **Keywords**

24 single cell RNA-sequencing, neural diversity, transcriptome, interneuron, cell type, replicability,  
25 bioinformatics

26 Single cell RNA-sequencing (scRNA-seq) has emerged as an important new technology  
27 enabling the dissection of heterogeneous biological systems into ever more refined cellular  
28 components. One popular application of the technology has been to try to define novel cell  
29 subtypes within a given tissue or within an already refined cell class, as in the lung<sup>1</sup>, pancreas<sup>2-</sup>  
30 <sup>5</sup>, retina<sup>6, 7</sup>, or others<sup>8-10</sup>. Because they aim to discover completely new cell subtypes, the  
31 majority of this work relies on unsupervised clustering, with most studies using customized  
32 pipelines with many unconstrained parameters, particularly in their inclusion criteria and  
33 statistical models<sup>7, 8, 11, 12</sup>. While there has been steady refinement of these techniques as the  
34 field has come to appreciate the biases inherent to current scRNA-seq methods, including  
35 prominent batch effects<sup>13</sup>, expression drop-outs<sup>14, 15</sup>, and the complexities of normalization given  
36 differences in cell size or cell state<sup>16, 17</sup>, the question remains: how well do novel transcriptomic  
37 cell subtypes replicate across studies?

38 In order to answer this, we turned to the issue of cell diversity in the brain, a prime target of  
39 scRNA-seq as neuron diversity is critical for construction of the intricate circuits underlying brain  
40 function. The heterogeneity of brain tissue makes it particularly important that results be  
41 assessed for replicability, while its popularity as a target of study makes this goal particularly  
42 feasible. Because a primary aim of neuroscience has been to derive a taxonomy of cell types<sup>18</sup>,  
43 already more than twenty single cell RNA-seq experiments have been performed using mouse  
44 nervous tissue<sup>19</sup>. Remarkable strides have been made to address fundamental questions about  
45 the diversity of cells in the nervous system, including efforts to describe the cellular composition  
46 of the cortex and hippocampus<sup>11, 20</sup>, to exhaustively discover the subtypes of bipolar neurons in  
47 the retina<sup>6</sup>, and to characterize similarities between human and mouse midbrain development<sup>21</sup>.  
48 This wealth of data has inspired attempts to compare data<sup>6, 12, 20</sup> and more generally in the  
49 single cell field there has been a growing interest in using batch correction and related  
50 approaches to fuse data across replicate samples or across experiments<sup>6, 22, 23</sup>. Historically,  
51 data fusion and modeling of experimental confounds have been necessary steps precisely

52 where individual experiments are underpowered or results do not replicate without correction<sup>24-26</sup>  
53 but even sophisticated approaches to merge data come with their own perils<sup>27</sup>. The technical  
54 biases of scRNA-seq have motivated interest in correcting them as a seemingly necessary fix,  
55 yet evaluation of whether results replicate in the first place remains largely unexamined and no  
56 systematic or formal method has been developed for accomplishing this task.

57 To address this gap in the field, we propose a simple, supervised framework, MetaNeighbor  
58 (**meta**-analysis via **neighbor** voting), to assess how well cell type-specific transcriptional profiles  
59 replicate across datasets. Our basic rationale is that if a cell type has a biological identity rooted  
60 in the transcriptome then knowing its expression features in one dataset will allow us to find  
61 cells of the same type in another dataset. We make use of the cell type labels supplied by data  
62 providers, and assess the correspondence of cell types across datasets by taking the following  
63 approach (see schematic, Figure 1):

64 1) We calculate correlations between all pairs of cells that we aim to compare across  
65 datasets based on the expression of a set of genes. This generates a network where  
66 each cell is a node and the edges are the strength of the correlations between them.

67 2) Next, we do cross-dataset validation: we hide all cell type labels ('identity') for one  
68 dataset at a time. This dataset will be used as our test set. Cells from all other datasets  
69 remain labeled, and are used as the training set.

70 3) Finally, we predict the cell type labels of the test set: we use a neighbor voting algorithm  
71 to predict the identity of the held-out cells based on their similarity to the training data.

72 Conceptually, this resembles approaches for the validation of sample clustering<sup>28, 29</sup>, which have  
73 primarily been applied to compare microarray results with respect to tumor subtyping<sup>30, 31</sup>. Our  
74 method builds on these ideas, adapting and applying them for the first time to the question of  
75 cell identity in single cell RNA-seq, and specifically exploiting the patterns of co-expression  
76 believed to drive results<sup>32</sup>. Because our implementation is extremely fast, this approach readily

77 permits carefully defined control experiments to investigate the data features that drive high  
78 performance, such as the dependence on expression variability, gene set size, rarity of cell  
79 types or subtlety of transcriptional identity.

80 We evaluate the replicability of cell type transcriptional identity by taking sequential steps  
81 according to the basic taxonomy of brain cells: first classifying neurons vs. non-neuronal cells  
82 across eight single cell RNA-seq studies, then classifying cortical inhibitory neurons vs.  
83 excitatory neurons, and for our final step, we align interneuron subtypes across three studies.  
84 With detailed control experiments and empirical modeling, we validate the use of highly variable  
85 genes for cross-dataset cell identification, a common approach for feature selection within  
86 individual experiments<sup>4, 33-35</sup>. Testing hundreds of gene sets, we find strong replication of  
87 neuronal identity when compared to non-neurons, and excitatory vs. inhibitory neurons, even  
88 across widely varying techniques such as nuclear RNA-sequencing or Drop-seq. Furthermore,  
89 we find that cortical interneuron subtypes show clear lineage-specific structure, and we readily  
90 identify 11 subtypes that appear to replicate across datasets, including Chandelier cells and five  
91 novel subtypes defined by transcriptional clustering in previous work. Meta-analysis of  
92 differential expression across these highly replicable cortical interneuron subtypes correctly  
93 identified canonical marker genes such as parvalbumin and somatostatin, as well as new  
94 candidates which may be used for improved molecular genetic targeting, and to understand the  
95 diverse phenotypes and functions of these cells.

## 96 **Results**

### 97 **Assessing neuronal identity with MetaNeighbor**

98 We aimed to measure the replicability of cell identity across tasks of varying specificity.  
99 Broadly, these are divided into tasks where we are recapitulating known cell identities, and ones  
100 where we are measuring the replicability of novel cell identities discovered in recent research.  
101 The former class of task is the focus of this subsection: first, by assessing how well we could

102 distinguish neurons from non-neuronal cells (“task one”), and next assessing the discriminability  
103 of excitatory and inhibitory neurons (“task two”). As detailed in the methods, MetaNeighbor  
104 outputs a performance score for each gene set and task. This score is the mean area under the  
105 receiver operator characteristic curve (AUROC) across all folds of cross-dataset validation, and  
106 it can be interpreted as the probability that we will rank a positive higher than a negative. For  
107 example, if given only information from other (training) datasets labeling neurons and non-  
108 neurons, and asking the algorithm to identify neurons within a given (testing) dataset, the  
109 AUROC is the probability a neuron will be ranked above a non-neuron. Importantly, there is no  
110 labeling within the dataset being assessed; only signals which are true from one dataset to the  
111 next can contribute to performance. The AUROC varies between 0 and 1, with 1 being perfect  
112 classification, 0.5 meaning that we have performed as well as if we had randomly guessed the  
113 cell’s identity (null), and 0.9 or above being extremely high. Low scores (0-0.3) can be  
114 interpreted with as much confidence as high scores, and mean that, for example, a neuron is  
115 definitely not a non-neuron. Comparison of scores across gene sets allows us to discover their  
116 relative capacity to discriminate cell types.

117 As described above, in task one we assessed how well we could identify neurons and non-  
118 neuronal cells across eight datasets with a total of 13928 cells (Supplementary Table 1).  
119 Although this was designed to be fairly simple, we were interested to discover that AUROC  
120 scores were significantly higher than chance for all gene sets tested, including all randomly  
121 chosen sets ( $AUROC_{\text{all sets}}=0.80 \pm 0.1$ , Figure 2A). A bootstrapped sampling of the datasets  
122 showed a trend toward increased performance with the inclusion of additional training data,  
123 indicating that we are recognizing an aggregate signal across datasets (Supplementary Figure  
124 1). However, the significant improvement of random sets over the null (i.e.,  $AUROC=0.5$ ) means  
125 that prior knowledge about gene function is not required to differentiate between these cell  
126 classes. Randomly chosen sets of genes have decidedly non-random expression patterns that  
127 enable discrimination between cell types. This is particularly surprising in the context of cross-

128 dataset assessment, where the low-dimensionality of cell identity observed within laboratories<sup>36</sup>  
129 is confounded by the even lower-dimensionality of experimental identity, even if controlled by  
130 within-lab ranking. This result recalls the startling finding by Venet *et al.* that “Most random gene  
131 expression signatures are related to breast cancer outcome”<sup>37</sup>; cell identity appears to be as  
132 clearly ascertainable.

133 Task two aimed to assess how well we could discriminate between cortical excitatory and  
134 inhibitory neurons across four studies with a total of 2809 excitatory and 1162 inhibitory  
135 neurons<sup>11, 12, 20, 38</sup>. Similar to our previous results, we saw that AUROC scores were significantly  
136 higher than chance (AUROC=0.69 ± 0.1, Figure 2B). While performance is higher than chance  
137 for both tasks, it is unclear whether the same gene sets are useful for distinguishing between  
138 neurons and non-neurons and between excitatory and inhibitory neurons. Comparing GO group  
139 performance across these two tasks we find that a handful of gene sets have high performance  
140 for both tasks (e.g., GO:0055085 transmembrane transport, AUROC>0.85, Figure 2C), while  
141 many GO groups show divergent performance. For example, we find that GO:0019748  
142 (secondary metabolic process) is only useful for distinguishing between neurons and non-  
143 neurons, but not at all for distinguishing between the two neuron classes (AUROC<sub>Task1</sub>=0.94 vs.  
144 AUROC<sub>Task2</sub>=0.53), perhaps due to cell cycling among non-neuronal cells. On the other  
145 extreme, we find that GO:0040011 (cell adhesion) is only useful for distinguishing between  
146 neuron classes but not between neurons and non-neuronal cells (AUROC<sub>Task1</sub>=0.43 vs.  
147 AUROC<sub>Task2</sub>=0.88), which is in line with previous work that has found that cell adhesion factors  
148 show neuron-type specific expression<sup>39, 40</sup>. These results indicate some degree of functional  
149 specificity for gene set performance, but the near equivalent performance of randomly chosen  
150 gene sets suggests that transcriptional differences are likely to be encoded in a large number of  
151 genes, in line with previous observations<sup>41</sup>. The properties of high performing sets are  
152 investigated in the following section.

## 153 **Characterizing features associated with high performance**

154 Consistent with the view that a large fraction of transcripts are useful for determining cell  
155 identity, we found a positive dependency of AUROC scores on gene set size, regardless of  
156 whether genes within the sets were randomly selected or shared some biological function  
157 (Figure 2D). This was further supported by a comparison of scores for task one when using  
158 randomly chosen sets of genes constrained to a given size. Here we used set sizes of 100 or  
159 800, similar to the extremes of the distribution of set sizes used in the GO analysis. AUROC  
160 score distributions and means were significantly different between gene sets of different sizes,  
161 with sets of 100 genes having lower scores but higher variability in performance, whereas sets  
162 of 800 genes are more restricted in variance and give higher performance on average (Figure  
163 2E,  $AUROC_{100}=0.75 \pm 0.06$ ,  $AUROC_{800}=0.87 \pm 0.02$ ,  $p<2.2E-16$ , Wilcoxon rank sum test). The  
164 variability in performance observed while keeping set size constant suggests that even in  
165 random sets, there are transcriptional features that contribute to cell identity. We delved into this  
166 further by comparing AUROC scores across gene sets chosen based on coefficient of variation,  
167 as MetaNeighbor relies on co-variation between genes to detect differences in cell type profiles.  
168 We performed task one again using these gene sets and found a strong positive relationship  
169 between variance and our ability to classify cells (Figure 2F,  $r_s=0.67$ ), though interestingly,  
170 genes in the top centile were completely uninformative ( $AUROC=0.47$ ). Taken together, these  
171 observations support the idea that transcriptional identity is broadly encoded across many  
172 genes, and suggests that it should be straightforward to select an informative gene set that  
173 takes advantage of properties associated with high performance. Testing our capacity to detect  
174 and exploit this signal requires us to refine the cell classes that we are characterizing, ideally  
175 beyond what is present in existing data to anticipate a wide range of use cases.

## 176 **Empirical modeling to determine precision**

177 Our ultimate aim is to identify all replicable cell types across datasets, some of which may be  
178 rare and/or only subtly different from other cell types. To assess the ability of MetaNeighbor to

179 identify cell types in these more realistic scenarios, we set up an empirical model for cell type  
180 rarity and subtlety (schematic Figure 3A), using inhibitory and excitatory neuron datasets with  
181 >100 cells for each type as these allow us to model cell type incidence down to 1%<sup>11, 12, 20</sup>. To  
182 address the impact of rarity on MetaNeighbor's performance, we alter the incidence of excitatory  
183 neurons to be within our observed range of subtype incidences, repeatedly sampling different  
184 combinations of cells to obtain mean performance estimates. Transcriptional subtlety is  
185 captured by only permitting a fraction of transcripts to vary between the two cell types. This  
186 treats transcriptional subtlety almost identically to a rare cell type, but in the dimension of  
187 transcripts rather than cells: a rare cell type is one in which only a few differing cells are present  
188 and a subtle transcriptional identity is one in which only a few differing genes are present.  
189 Subtlety is modeled by swapping out, e.g., the same 95% of the transcriptional profiles across  
190 all excitatory cell transcriptional data for data from inhibitory cells, so that all cells sample from  
191 the same cell class for 95% of their profile (all sampled across cells without replacement to  
192 ensure there are no confounding overlaps). At each level of rarity and subtlety we measure  
193 AUROCs across datasets with MetaNeighbor, using the highest performing GO group for this  
194 data as a positive control for gene set selection (identified in the previous analysis to be  
195 GO:0022857) and a randomly chosen set of 20 genes as a negative control, having established  
196 that small gene sets tend to have low performance.

197 As expected, GO:0022857 performance is higher than the random set of 20 genes at both 1%  
198 and 20% incidences (Figure 3B). Importantly, MetaNeighbor performance is nearly unaffected  
199 by differences in rarity: GO set performance is equally high when excitatory neurons make up  
200 1% or 20% of all cells in each dataset, with n as low as 1 cell in the tested data. This is possible  
201 because within-dataset labeling is not exploited for training, so rarity is largely irrelevant for  
202 scoring. Comparison across multiple datasets in training makes even rare cell types learnable.  
203 Of interest is the robustness of MetaNeighbor to transcriptional subtlety. Of course, increasing  
204 subtlety leads to worse performance at both incidences, and falls to chance levels at subtleties



205 >99% (AUROC=0.5). However, even at almost 90% subtlety MetaNeighbor correctly identifies  
206 excitatory neurons with a mean AUROC of 0.71. Since this subtlety is relative to the  
207 transcriptional variability that exists between inhibitory and excitatory cells, it is quite extreme.  
208 Consistent with our previous results comparing performance across all GO functions, this  
209 suggests that there are marked and widespread differences in excitatory and inhibitory neuron  
210 gene expression, such that even sampling a small fraction of genes (<10%) allows for  
211 identification of these two classes. In sum, these results provide strong evidence that  
212 MetaNeighbor is robust to differences in rarity, and gives guidance for the interpretation of  
213 AUROC scores in light of this factor, suggesting the subtlety of cell identity relative to the  
214 outside control.

### 215 **Empirical modeling to evaluate gene set selection**

216 In the previous section we demonstrated that the highest performing GO group for the excitatory  
217 vs. inhibitory comparison is robust to variation in either incidence or transcriptional subtlety, still  
218 permitting high-performing identification of these two classes when cells are rare or only subtly  
219 distinguishable. Determining this gene set requires known concordance of cell types across  
220 datasets. When concordance is unknown, for example when cell type labeling is idiosyncratic, it  
221 is necessary to have a strategy to identify informative gene sets *ab initio*. Expert knowledge of  
222 informative marker genes is one possibility, though this approach may not be extensible to  
223 newly described cell subtypes and suffers from potential ascertainment bias. As a more general  
224 alternative, the selection of highly variable genes (HVG) is commonly used in single cell  
225 analysis prior to dimension reduction and clustering<sup>4, 7, 33-35</sup>, as it is thought that differentially  
226 expressed genes or marker genes should be preferentially variable, and potentially less subject  
227 to joint low-level noise. This is in line with our previous observation that gene sets containing  
228 highly variable genes are high performing. Indeed, when we select a set of HVG (detailed in  
229 Methods) we can almost perfectly identify excitatory neurons compared to inhibitory neurons

230 across datasets (AUROC=0.99) which is equivalent to the highest performing GO group, but  
231 without any prior knowledge.

232 In parallel to our previous analyses, we assessed the robustness of HVG selection at different  
233 levels of rarity and subtlety, using either HVG picked from the original dataset that includes all  
234 cells (HVG static), or HVG re-calculated based on the precise subset of data included in each  
235 run of the empirical model (HVG varying) (Figure 3C). Here, we see that our HVG selection  
236 strategy performs equally to or better than the highest performing GO functional gene set for  
237 both rare cell types (1%-20% of total), as well as for subtle cell types (differing from out-group  
238 by <10%). Interestingly, the HVG heuristic is even responsive to the precise data sampling,  
239 yielding modestly improved performance when it is selected based on the precise data  
240 generated by the empirical model. It is, perhaps, unsurprising, that the heuristic which many  
241 teams of researchers have converged on is a profoundly useful one, but its elegance and  
242 robustness are not only valuable but important to understand as a likely baseline upon which  
243 more complicated approaches will rest.

244 These results provide evidence that MetaNeighbor can readily identify cells of the same type  
245 across datasets, without relying on specific knowledge of marker genes, even when cells are  
246 rare (1% total) or only subtly different from other cells in the out-group against which they are  
247 being compared. Importantly, these results also provide guidelines for interpreting AUROCs at  
248 cell incidences  $\geq 1\%$  in terms of their implications for the promiscuity of cell identity across the  
249 transcriptome.

## 250 **Investigating cortical interneuron subtypes using MetaNeighbor**

251 Cortical inhibitory interneurons have diverse characteristics based on their morphology,  
252 connectivity, electrophysiology and developmental origins, and it has been an ongoing goal to  
253 define cell subtypes based on these properties<sup>18</sup>. In a related paper<sup>40</sup>, we describe the  
254 transcriptional profiles of GABAergic interneuron types which were targeted using a

255 combinatorial strategy including intersectional marker gene expression, cell lineage, laminar  
256 distribution and birth timing, and have been extensively phenotyped both electrophysiologically  
257 and morphologically<sup>42</sup>. Previously, two studies were published in which new interneuron  
258 subtypes were defined based on scRNA-seq transcriptional profiles<sup>11, 20</sup>. Because of differences  
259 in experimental design and analytic choices, the two studies found different numbers of  
260 subtypes (16 in one and 23 in the other). The authors of the later paper compared their  
261 outcomes by looking at the expression of a handful of marker genes, which yielded mixed  
262 results: a small number of cell types seemed to have a direct match but for others the results  
263 were more conflicting, with multiple types matching to one another, and others having no match  
264 at all. Here we aimed to more quantitatively assess the similarity of their results, and compare  
265 them with our own data which derives from phenotypically characterized sub-populations; i.e.,  
266 not from unsupervised expression clustering (see Supplementary Table 2 for sample  
267 information).

268 To examine how the previously identified interneuron subtypes are represented across the three  
269 studies, we tested the similarity of each pair of subtypes across datasets using HVGs. This was  
270 done by alternately considering each subtype as the positive training set, and each other  
271 subtype as the test set, answering questions of the class, e.g., “How well does the Zeisel\_Int1  
272 HVG expression predict the identity of the Tasic\_Smad3 subtype relative to all interneurons in  
273 the Tasic data? How well does Tasic\_Smad3 HVG expression predict Zeisel\_Int1 identity  
274 relative to all other interneurons in the Zeisel data?”. Each subtype ranges in incidence from 1-  
275 24% of the total number of cells within its own dataset, well within the range of the sensitivity of  
276 MetaNeighbor as established above. For each genetically-targeted interneuron type profiled by  
277 Paul *et al.*, we find a reciprocal best match in the pre-existing data: Paul Sst-Nos1/Tasic Sst-  
278 Chodl (AUROC=1), Paul ChC/Tasic Pvalb-Cpne5 (AUROC=0.99), Paul Sst-CR/Tasic Sst-Cbln4  
279 (AUROC=0.98), Paul Pv/Tasic Pvalb-Wt1 (AUROC=0.96), Paul Vip-CR/Tasic Vip-Chat  
280 (AUROC=0.96), Paul Vip-Cck/Tasic Vip-Sncg (AUROC=0.95) (Figure 4, all scores in

281 Supplementary Table 3). In addition, expanding our criteria to include all reciprocal best  
282 matches, and those with AUROC scores  $\geq 0.95$ , we find additional matches for the Paul  
283 subtypes, as well as correspondence among five subtypes that were assessed only in the Tasic  
284 and Zeisel data: Tasic Smad3/Zeisels Int14 (AUROC=0.97), Tasic Sncg/Zeisels Int6  
285 (AUROC=0.95), Tasic Ndnf-Car4/Zeisels Int15 (AUROC=0.95), Tasic Igtp/Zeisels Int13  
286 (AUROC=0.94) and Tasic Ndnf-Cxcl14/Zeisels Int12 (AUROC=0.91). Overall we identified 11  
287 subtypes representing 24/45 (53%) types (Figure 4A), with total n for each subtype ranging from  
288 25-189 out of 1583 interneurons across all datasets (1.5-11%). Our corresponding subtypes  
289 also confirm the marker gene analysis performed by Tasic *et al.* (Supplementary Table 3),  
290 without requiring manual gene curation. Because we quantify the similarity among types we can  
291 prioritize matches, and use these as input to MetaNeighbor for further evaluation.

292 To assess cell identification more broadly, we ran MetaNeighbor with these new across-dataset  
293 subtype labels, measuring predictive validity across all gene sets in GO (Figure 4B). The  
294 distribution of AUROC scores varied across subtypes but we found that the score from the high  
295 variability gene set was representative of overall trends, with high performing groups showing  
296 higher mean AUROC scores over many gene sets. Both the high mean AUROCs across all  
297 putative replicate subtypes, and the similarity of maximum performance suggest that distinctive  
298 gene co-expression can be observed in each subtype (max AUROC=0.92  $\pm$  0.04). As with  
299 previous tasks, we found little difference in average AUROCs using functional gene sets  
300 compared to random sets (mean AUROC<sub>Random</sub>=0.67  $\pm$  0.06, mean AUROC<sub>GO</sub>=0.68  $\pm$  0.1). Top  
301 performing GO groups for each of the 11 replicate interneuron subtypes were primarily related  
302 to neuronal function, which is expected due to the large size of these gene sets and their  
303 likelihood of expression and variation in these cells (Figure 4C).

304 These results suggest that highly variable gene sets can be used alongside pairwise testing and  
305 training as a heuristic to identify replicable subtypes for further evaluation. Indeed, while outside  
306 the scope of our primary analysis, we have found that re-analysis of tens of thousands of cells

307 from mouse cortical and hippocampal pyramidal neurons<sup>11, 12, 20</sup>, retina<sup>6, 7</sup> and human pancreas<sup>2,</sup>  
308 <sup>3, 5, 43, 44</sup> provide strong evidence for the broad applicability of this approach (detailed in the  
309 Supplementary Note).

### 310 **Identifying subtype specific genes**

311 ScRNA-seq experiments often seek to define marker genes for novel subtypes. Though ideally  
312 marker genes are perfectly discriminative with respect to all cells, in practice marker genes are  
313 often contextual and defined relative to a particular out-group. Typically, only a very small  
314 number of genes are reported in single cell papers due to the complexity of discussing dozens  
315 of cell types as well as the potential technical confounds which would limit the expected  
316 replicability of any attempt at a more comprehensive list<sup>5, 7, 11, 20</sup>. Here we aimed to identify  
317 possible marker genes that would allow discrimination among interneuron subtypes. For each of  
318 our identified replicate subtypes we generated a ranked list of possible marker genes by  
319 performing one-tailed, non-parametric differential expression analysis within each study for all  
320 subtypes (e.g., Int1 vs. all other interneurons in the Zeisel study, Int2 vs. all interneurons, etc.)  
321 and combining p-values for replicated types using Fisher's method (Supplementary Table 4).  
322 While data-merging is of potential value in identifying weakly variable genes through improved  
323 power, assessing labs independently ("data slicing") is imperative to identify the most robustly  
324 replicable features which will generalize to new labs without additional modeling. Figure 4A  
325 shows the FDR adjusted p-values for the top candidates based on fold change for the ten  
326 replicated interneuron subtypes with overlapping differential expression patterns. The majority of  
327 these genes have previously been characterized as having some degree of subtype-specific  
328 expression, for example we readily identify genes that were used for the Cre-driver lines in the  
329 Tasic and Paul studies (*Sst*, *Pvalb*, *Vip*, *Cck*, *Htr3a*), as well as all markers previously reported  
330 to intersect between the Tasic and Zeisel data (Supplementary Table 4). Even though we  
331 filtered for genes with high fold changes, we see that many genes are differentially expressed in  
332 more than one subtype. Notably, considerable overlap can be observed among the *Htr3a*-

333 expressing types. For example, the Vip Sncg subtype (Tasic Vip Sncg/Paul Vip Cck) is only  
334 subtly different from the Sncg subtype (Tasic Sncg/Zeisel Int6) across this subset of genes, with  
335 the Sncg cells lacking differential expression of *Cxcl14* and *Nr2f2*.

336 We also identify some novel candidates, including *Ptn*, or pleiotrophin, which is significantly  
337 more expressed in the three *Sst* and *Nos1*-expressing subtypes than in the others (Figure 4B).  
338 It is thus expected to be discriminative of these neurons compared to other interneuron types.  
339 We validated *Ptn* expression with genetic targeting<sup>40</sup>, and we show clear expression in neurons  
340 that stain positively for NOS1 and have morphological features characteristic of long projecting  
341 interneurons (Figure 4C). *Ptn* is a growth factor, and we suggest that its expression may be  
342 required for maintaining the long-range axonal connections that characterize these cells. These  
343 cells are well described by current markers, however this approach is likely to be of particular  
344 value for novel subtypes that lack markers, allowing researchers to prioritize genes for follow-up  
345 by assessing robustness across multiple data sources.

## 346 Discussion

347 Single-cell transcriptomics promises to have a revolutionary impact by enabling comprehensive  
348 sampling of cellular heterogeneity; nowhere is this variability more profound than within the  
349 brain, making it a particular focus of both single-cell transcriptomics and our own analysis into  
350 its replicability. The substantial history of transcriptomic analysis and meta-analysis gives us  
351 guidance about bottlenecks that will be critical to consider in order to characterize cellular  
352 heterogeneity. The most prominent of these is laboratory-specific bias, likely deriving from the  
353 adherence to a strict set of internal standards, which may filter for some classes of biological  
354 signal (e.g., poly-A selection) or induce purely technical grouping (e.g., by sequencing depth).  
355 Because of this, it is imperative to be able to compare data across studies and determine some  
356 form of consensus. Indeed, while this work was under review, five manuscripts became  
357 available that tackle different aspects of this problem, including robust low-dimensional

358 representation and the use of reference data for cell classification<sup>45, 46</sup>, batch correction using  
359 nearest neighbors<sup>22</sup> and data fusion via manifold alignment<sup>23, 47</sup>. Our paper is unique in its aim  
360 and ability to quantify the degree of replicability observable within single cell RNA-seq data,  
361 making use of interpretable methods and concrete performance metrics. In this work, we have  
362 provided a formal means of determining replicable cell identity by treating it as a quantitative  
363 prediction task. The essential premise of our method is that if a cell type has a distinct  
364 transcriptional profile within a dataset, then an algorithm trained from that data set will correctly  
365 identify the same type within an independent data set.

366 The currently available data allowed us to draw a number of conclusions. We validated the  
367 identity of eleven interneuron subtypes, and described replicate transcriptional profiles to  
368 prioritize possible marker genes, including *Ptn*, a growth factor that is preferentially expressed in  
369 Sst Chodl cells. One major surprise of our analysis is the degree of replicability in the current  
370 data. AUROC scores are exceptionally high, particularly when considered in the context of the  
371 well-described technical confounds of single-cell data. We suspect this reflects the fundamental  
372 nature of the biological problem we are facing: cell types can be identified by their transcriptional  
373 profiles, and the biological clarity of the problem overcomes technical variation. Echoing earlier  
374 work on cancer subtyping<sup>30</sup>, we caution that orthogonal data will be required to more firmly  
375 establish the biological basis of cell identity; the current estimates must be regarded as  
376 optimistic since most clusters are defined from gene expression to begin with. However, the  
377 clarity of cell identity is further suggested by our result that cell identity has promiscuous effects  
378 within transcriptional data. While in-depth investigation of the most salient gene functions is  
379 required to characterize cell types, to simply identify cell types is relatively straightforward. This  
380 is necessarily a major factor in the apparent successes of unsupervised methods in determining  
381 novel cell types and suggests that cell type identity is clearly defined by transcriptional profiles,  
382 regardless of cell selection protocols, library preparation techniques or fine-tuning of clustering  
383 algorithms.

384 Our empirical modeling suggests that this clear signal will permit cell types to be identified down  
385 to even greater specificity, but not indefinitely, and some areas of concern within even the  
386 present data are worth highlighting. In this work we opted to use the subtype or cluster labels  
387 provided by the original authors, in essence to characterize both the underlying data as well as  
388 current analytic practices. However, this has limitations where studies cluster to different levels  
389 of specificity. This reflects quite real ambiguity about the degree of specificity associated with  
390 the term “cell type”. For example, nearly all Pvalb subtypes from the Tasic dataset and the  
391 Zeisel Int3 type have AUROC scores  $>0.9$  for the Paul Pv type, as can be seen in the bottom  
392 left corner of the heatmap in Figure 4A (Tasic Pvalb\_Obox3=0.95, Zeisel Int3 = 0.94, Tasic  
393 Pvalb\_Tacr3 = 0.94, Tasic Pvalb\_Rspo2 = 0.92), suggesting that these may form one larger or  
394 more general Parvalbumin-positive type. It is here that the concrete meaning of AUROCs helps.  
395 While reciprocal top-hits and AUROCs $>0.95$  reflect extreme confidence in a highly concordant  
396 cell type, more moderate scores are still meaningful. In most domains of biological study,  
397 AUROCs $>0.9$  are extraordinarily high (e.g.,<sup>48, 49</sup>), and we suggest that any such pairing is  
398 worthy of discussion and likely reflects real overlaps without indicating replicability. Moving past  
399 this point and distinguishing between only subtly different types will be difficult for any analysis,  
400 and their discovery will require consideration of appropriate controls and comparisons (e.g.,  
401 sub-clustering or subset comparisons). The notion of experimental control is built into our  
402 scoring method (AUROCs), which by definition is comparing positive and negative cases across  
403 the data. As in all classification tasks, choice of an unreasonable out-group or control will  
404 generate misleading results, and the closest outgroup is usually the most appropriate. Within  
405 our current framework we suggest that a hierarchical approach, moving from broad to subtle  
406 categories, will provide a comprehensive, multi-scale view of cell type replicability. We note that  
407 our implementation is both robust and fast, but further development of MetaNeighbor and its  
408 basic framework may yield improvements (e.g., optimization of feature selection, multi-kernel  
409 approaches for cell similarity network estimation, more sophisticated machine learning  
410 algorithms).



411 A key bottleneck, however, is the availability of the data itself. While many groups make their  
412 data available in some format, without field-wide standards this data is necessarily more difficult  
413 to wrangle than it need be. A common issue is the absence of inferred cell type labels. While it  
414 will likely take time and concerted effort for naming conventions to be established, it is crucial  
415 that authors make cell labels publicly available in easy-to-access flat text files along with the  
416 final parsed expression data matrix to which those labels were applied (or derived). Our wish list  
417 for study metadata would also include standardized reporting of cell viability estimates, cell  
418 capture method, library preparation method and batch identifiers, alongside biological covariates  
419 such as age, sex and strain. More comprehensive reporting would allow for deeper evaluation of  
420 technical and biological factors that influence single cell expression results. As the project of  
421 assembling a comprehensive human cell atlas gets underway<sup>50</sup>, we hope that participants  
422 continue to learn lessons from MAQC and other large consortia projects, making results quickly  
423 and readily available to the public, and recognizing the value of heterogeneity in experimental  
424 and computational approaches as an assay into biologically robust results with independent and  
425 replicable evidence.

426

## 427 **Online Methods**

### 428 **Public expression data**

429 Data analysis was performed in R using custom scripts<sup>51</sup>. Processed expression data tables  
430 were downloaded from GEO directly, then subset to genes appearing on both Affymetrix  
431 GeneChip Mouse Gene 2.0 ST array (902119) and the UCSC known gene list to generate a  
432 merged matrix containing all samples from each experiment. The mean value was taken for all  
433 genes with more than one expression value assigned. Where no gene name match could be  
434 found, a value of 0 was input. We considered only samples that were explicitly labeled as single  
435 cells, and removed cells that expressed fewer than 1000 genes with expression >0. Cell type  
436 labels were manually curated using sample labels and metadata from GEO (see Tables S1 and  
437 S2). Merged data and metadata are linked through our Github page.

### 438 **Gene sets**

439 Gene annotations were obtained from the GO Consortium 'goslim\_generic' (August 2015).  
440 These were filtered for terms appearing in the GO Consortium mouse annotations  
441 'gene\_association.mgi.gz' (December 2014) and for gene sets with between 20-1000 genes,  
442 leaving 106 GO groups with 9221 associated genes. Random gene sets were generated by  
443 randomly choosing genes with the same set size distribution as GO slim. Gene sets based on  
444 coefficient of variation were generated by measuring the coefficient of variation for each gene  
445 within each dataset, ranking these lists, then taking the average across datasets. The average  
446 was then binned into centiles. Sets of highly variable genes were generated by binning data  
447 from each dataset into deciles based on expression level, then making lists of the top 25% of  
448 the most variable genes for each decile, excluding the most highly expressed bin. The highly  
449 variable gene set was then defined as the intersect of the highly variable gene lists across the  
450 relevant datasets. Although this did not occur within our analysis, the use of the intersect is  
451 likely to be too stringent as the number of datasets for comparison increases. In this case, a  
452 majority rule on the highly variable set across datasets appears to be a practicable strategy.

453 Further commentary regarding high variable gene set selection may be found in the  
454 Supplementary Note.

## 455 **MetaNeighbor**

456 All scripts, sample data and detailed directions to run MetaNeighbor in R can be found on our  
457 Github page<sup>51</sup>.

458 The input to MetaNeighbor is a set of genes, a data matrix and two sets of labels: one set for  
459 labeling each experiment, and one set for labeling the cell types of interest. For each gene set,  
460 the method generates a cell-cell similarity network by measuring the Spearman correlation  
461 between all cells across the genes within the set, then ranking and standardizing the network so  
462 that all values lie between 0 and 1. The use of rank correlations means that the method is  
463 robust to any rank-preserving normalization (i.e., log2, TPM, RPKM). Ranking and standardizing  
464 the networks ensures that distributions remain uniform across gene sets, and diminishes the  
465 role outlier similarities can play since values are constrained. In previous work we have  
466 demonstrated that networks constructed in this way are both robust and highly effective for  
467 capturing gene co-expression as evaluated by a variety of machine learning methods<sup>52</sup>.

468 The node degree of each cell is defined as the sum of the weights of all edges connected to it  
469 (i.e., the sum of the standardized correlation coefficients between each cell and all others), and  
470 this is used as the null predictor in the neighbor voting algorithm to standardize for a cell's 'hub-  
471 ness': cells that are generically linked to many cells are preferentially down-weighted, whereas  
472 those with fewer connections are less penalized. For each cell type assessment, the neighbor  
473 voting predictor produces a weighted matrix of predicted labels by performing matrix  
474 multiplication between the network and the binary vector (0,1) indicating cell type membership,  
475 then dividing each element by the null predictor (i.e., node degree). In other words, each cell is  
476 given a score equal to the fraction of its neighbors, including itself, which are part of a given cell  
477 type<sup>53</sup>. A difference from KNN is that all cells are neighbors to one another, just to varying

478 degrees (defined by the weighted cell-cell similarity network). For cross-validation, we permute  
479 through all possible combinations of leave-one-dataset-out cross-validation, sequentially hiding  
480 each experiment's cell labels in turn, and then reporting how well we can recover cells of the  
481 same type as the mean area under the receiver operator characteristic curve (AUROC) across  
482 all folds. A key difference from conventional cross-validation is that there is no labeled data  
483 within the dataset for which predictions are being made. Labeled data comes only from external  
484 datasets, ensuring predictions are driven by signals that are replicable across data sources. To  
485 improve speed, AUROCs are calculated analytically, where the AUROC for each cell type  $j$ , is  
486 calculated based on the sum of the ranks of the scores for each cell  $i$  ( $Ranks_i$ ), belonging to that  
487 cell type, ranked out of all cells within the dataset. This can be expressed as follows:

$$AUROC_j = \sum_i^N \frac{Ranks_i}{N * N_{Neg}} - \frac{N + 1}{2 * N_{Neg}}$$

488 where  $N$  is the number of true positives (cells of type  $j$ ), and  $N_{Neg}$  is the number of true negatives  
489 (cells not of type  $j$ ). Thus, the AUROC calculates the probability that the classifier correctly  
490 predicts that a cell of type  $j$  outranks a cell not of type  $j$  within the test data set based on  
491 similarity to the labeled data in the training data set(s). Note that for experiments with only one  
492 cell type this cannot be computed as there are no true negatives. AUROCs are reported as  
493 averages across all folds of cross-validation for each gene set (excluding NAs from experiments  
494 with no negatives), and the distribution across gene sets is plotted.

#### 495 **Empirical model of cell type rarity and subtlety**

496 To test the impact of cell type rarity and transcriptional subtlety on MetaNeighbor performance,  
497 we repeated the excitatory vs. inhibitory cell discrimination task using the Tasic, Zeisel and  
498 Habib datasets which contained >100 cells per cell type, allowing us to assess cell incidences  
499 as low as 1%. The essence of the model is to construct a genes by cells matrix in which the  
500 biclustering problem to identify cell types from their variation in expression would be increasingly

501 challenging, with both a smaller and smaller fraction of cells (rarity) within the minority class and  
502 a smaller and smaller fraction of transcripts distinguishing those cells (subtlety). We model this  
503 variability in transcriptional subtlety by sampling different fractions of the transcriptome from the  
504 minority class; so, for example, a dataset could be generated in which only 1% of cells have  
505 only 10% of their gene expression values sampled from the minority class with the remainder  
506 sampled from the majority class. Each minority class cell's expression vector would thus be the  
507 discrete combination of two real cells, one excitatory and one inhibitory. In all cases, real  
508 expression values are used with strict partitioning, e.g., sampling without replacement from  
509 expression vectors defining cells. Each analysis for a given value of rarity and subtlety was  
510 repeated 100 times and means across random sub-samplings of genes and cells are plotted in  
511 Figure 3.

### 512 **Identifying putative replicates**

513 In cases where cell identity was undefined across datasets (i.e., cortical interneuron subtypes)  
514 we treated each subtype label as a positive for each other subtype, and assessed similarity  
515 using HVGs. For example, Int1 from the Zeisel dataset was used as the positive (training) set,  
516 and all other subtypes were considered the test set in turn. Mean AUROCs from both testing  
517 and training folds are plotted in the heatmap in Figure 4. Reciprocal best matches across  
518 datasets and AUROCs $\geq$ 0.95 were used to identify putative replicated types for further  
519 assessment with our supervised framework (detailed above). New cell type labels  
520 encompassing these replicate types (e.g. a combined Sst-Chodl label containing Int1 (Zeisel),  
521 Sst Chodl (Tasic) and Sst Nos1 (Paul)) were generated for MetaNeighbor across random and  
522 GO sets, and for meta-analysis of differential expression. While only reciprocal top-hits across  
523 laboratories were used to define putative replicate cell types, conventional cross-validation  
524 within laboratories was performed to fill in AUROC scores across labels contained within each  
525 lab.

## 526 **Differential expression**

527 For each cell type within a dataset (defined by the authors' original labeling), differential gene  
528 expression was calculated using a one-sided Wilcoxon rank-sum test, comparing gene  
529 expression within a given cell type to all other cells within the dataset (e.g., Zeisel\_Int1 vs all  
530 other Zeisel interneurons). Meta-analytic p-values were calculated for each putative replicated  
531 type using Fisher's method<sup>54</sup> then a multiple hypothesis test correction was performed with the  
532 Benjamini-Hochberg method<sup>55</sup>. Top differentially expressed genes were those with an adjusted  
533 meta-analytic p-value <0.001 and with log2 fold change >2 in each dataset. All differential  
534 expression data for putative replicated subtypes can be found in Supplementary Table 4. Details  
535 regarding the generation of Ptn-CreER transgenic mice, immunostaining and imaging may be  
536 found in Paul *et al.* The image in panel 5C was taken at the same time as those presented in  
537 Supplementary Figure 6 of that paper.

## 538 **Author Contributions**

539 JG conceived the study. JG, MC, and JH designed experiments. MC and JG wrote the  
540 manuscript. MC and SB performed computational experiments. AP performed immunostaining.  
541 JH supervised wet-lab data collection. All authors read and approved the final manuscript.

## 542 **Acknowledgments**

543 MC was supported by NIH F32MH114501. SB and JG were supported by NIH R01MH113005  
544 and a gift from T. and V. Stanley. Z.J.H. was supported by NIH 5R01MH094705-04,  
545 R01MH109665-01 and the CSHL Robertson Neuroscience Fund. A.P. was supported by a  
546 NARSAD Postdoctoral Fellowship. The authors would like to thank Paul Pavlidis, Bo Li and  
547 Jessica Tollkuhn for their thoughtful feedback on earlier drafts of this manuscript. We would also  
548 like to thank the dedicated researchers who have made their data publicly available. Our work  
549 would not be possible without their valuable contributions.

550

## 551 References

- 552 1. Treutlein, B. et al. Reconstructing lineage hierarchies of the distal lung epithelium using  
553 single-cell RNA-seq. *Nature* **509**, 371-375 (2014).
- 554 2. Wang, Y.J. et al. Single cell transcriptomics of the human endocrine pancreas. *Diabetes*  
555 (2016).
- 556 3. Muraro, Mauro J. et al. A Single-Cell Transcriptome Atlas of the Human Pancreas. *Cell*  
557 *Systems* **3**, 385-394.e383 (2016).
- 558 4. Segerstolpe, A. et al. Single-Cell Transcriptome Profiling of Human Pancreatic Islets in  
559 Health and Type 2 Diabetes. *Cell metabolism* **24**, 593-607 (2016).
- 560 5. Baron, M. et al. A Single-Cell Transcriptomic Map of the Human and Mouse Pancreas  
561 Reveals Inter- and Intra-cell Population Structure. *Cell Systems* **3**, 346-360.e344 (2016).
- 562 6. Shekhar, K. et al. Comprehensive Classification of Retinal Bipolar Neurons by Single-  
563 Cell Transcriptomics. *Cell* **166**, 1308-1323.e1330 (2016).
- 564 7. Macosko, E.Z. et al. Highly Parallel Genome-wide Expression Profiling of Individual Cells  
565 Using Nanoliter Droplets. *Cell* **161**, 1202-1214 (2015).
- 566 8. Grun, D. et al. Single-cell messenger RNA sequencing reveals rare intestinal cell types.  
567 *Nature* **525**, 251-255 (2015).
- 568 9. Min, J.W. et al. Identification of Distinct Tumor Subpopulations in Lung Adenocarcinoma  
569 via Single-Cell RNA-seq. *PLoS One* **10**, e0135817 (2015).
- 570 10. Klein, A.M. et al. Droplet barcoding for single-cell transcriptomics applied to embryonic  
571 stem cells. *Cell* **161**, 1187-1201 (2015).
- 572 11. Zeisel, A. et al. Brain structure. Cell types in the mouse cortex and hippocampus  
573 revealed by single-cell RNA-seq. *Science (New York, N. Y.)* **347**, 1138-1142 (2015).
- 574 12. Habib, N. et al. Div-Seq: Single-nucleus RNA-Seq reveals dynamics of rare adult  
575 newborn neurons. *Science (New York, N. Y.)* **353**, 925-928 (2016).
- 576 13. Hicks, S.C., Townes, F.W., Teng, M. & Irizarry, R.A. Missing Data and Technical  
577 Variability in Single-Cell RNA- Sequencing Experiments. *bioRxiv* (2017).
- 578 14. Pierson, E. & Yau, C. ZIFA: Dimensionality reduction for zero-inflated single-cell gene  
579 expression analysis. *Genome biology* **16**, 241 (2015).
- 580 15. Lun, A.T., Bach, K. & Marioni, J.C. Pooling across cells to normalize single-cell RNA  
581 sequencing data with many zero counts. *Genome biology* **17**, 75 (2016).
- 582 16. Vallejos, C.A., Marioni, J.C. & Richardson, S. BASiCS: Bayesian Analysis of Single-Cell  
583 Sequencing Data. *PLoS Comput Biol* **11**, e1004333 (2015).
- 584 17. Buettner, F. et al. Computational analysis of cell-to-cell heterogeneity in single-cell RNA-  
585 sequencing data reveals hidden subpopulations of cells. *Nature biotechnology* **33**, 155-  
586 160 (2015).

- 587 18. Ascoli, G.A. et al. Petilla terminology: nomenclature of features of GABAergic  
588 interneurons of the cerebral cortex. *Nat Rev Neurosci* **9**, 557-568 (2008).
- 589 19. Poulin, J.-F., Tasic, B., Hjerling-Leffler, J., Trimarchi, J.M. & Awatramani, R.  
590 Disentangling neural cell diversity using single-cell transcriptomics. *Nature neuroscience*  
591 **19**, 1131-1141 (2016).
- 592 20. Tasic, B. et al. Adult mouse cortical cell taxonomy revealed by single cell  
593 transcriptomics. *Nature neuroscience* **19**, 335-346 (2016).
- 594 21. La Manno, G. et al. Molecular Diversity of Midbrain Development in Mouse, Human, and  
595 Stem Cells. *Cell* **167**, 566-580.e519 (2016).
- 596 22. Haghverdi, L., Lun, A.T.L., Morgan, M.D. & Marioni, J.C. Correcting batch effects in  
597 single-cell RNA sequencing data by matching mutual nearest neighbours. *bioRxiv*  
598 (2017).
- 599 23. Butler, A. & Satija, R. Integrated analysis of single cell transcriptomic data across  
600 conditions, technologies, and species. *bioRxiv* (2017).
- 601 24. Warnat, P., Eils, R. & Brors, B. Cross-platform analysis of cancer microarray data  
602 improves gene expression based classification of phenotypes. *BMC bioinformatics* **6**,  
603 265 (2005).
- 604 25. Stegle, O., Parts, L., Durbin, R. & Winn, J. A Bayesian Framework to Account for  
605 Complex Non-Genetic Factors in Gene Expression Levels Greatly Increases Power in  
606 eQTL Studies. *PLOS Computational Biology* **6**, e1000770 (2010).
- 607 26. Sullivan, P.F. The Psychiatric GWAS Consortium: Big Science Comes to Psychiatry.  
608 *Neuron* **68**, 182-186 (2010).
- 609 27. Nygaard, V., Rødland, E.A. & Hovig, E. Methods that remove batch effects while  
610 retaining group differences may lead to exaggerated confidence in downstream  
611 analyses. *Biostatistics (Oxford, England)* **17**, 29-39 (2015).
- 612 28. Dudoit, S., Fridlyand, J. & Speed, T.P. Comparison of Discrimination Methods for the  
613 Classification of Tumors Using Gene Expression Data. *Journal of the American*  
614 *Statistical Association* **97**, 77-87 (2002).
- 615 29. Kapp, A.V. & Tibshirani, R. Are clusters found in one dataset present in another dataset?  
616 *Biostatistics (Oxford, England)* **8**, 9-31 (2007).
- 617 30. Sorlie, T. et al. Repeated observation of breast tumor subtypes in independent gene  
618 expression data sets. *Proceedings of the National Academy of Sciences of the United*  
619 *States of America* **100**, 8418-8423 (2003).
- 620 31. Kapp, A.V. et al. Discovery and validation of breast cancer subtypes. *BMC genomics* **7**,  
621 231 (2006).
- 622 32. Wagner, A., Regev, A. & Yosef, N. Revealing the vectors of cellular identity with single-  
623 cell genomics. *Nat Biotech* **34**, 1145-1160 (2016).



- 624 33. Brennecke, P. et al. Accounting for technical noise in single-cell RNA-seq experiments.  
625 *Nature methods* **10**, 1093-1095 (2013).
- 626 34. Kolodziejczyk, A.A., Kim, J.K., Svensson, V., Marioni, J.C. & Teichmann, S.A. The  
627 technology and biology of single-cell RNA sequencing. *Mol Cell* **58**, 610-620 (2015).
- 628 35. Campbell, J.N. et al. A molecular census of arcuate hypothalamus and median  
629 eminence cell types. *Nature neuroscience* **20**, 484-496 (2017).
- 630 36. Heimberg, G., Bhatnagar, R., El-Samad, H. & Thomson, M. Low Dimensionality in Gene  
631 Expression Data Enables the Accurate Extraction of Transcriptional Programs from  
632 Shallow Sequencing. *Cell Syst* **2**, 239-250 (2016).
- 633 37. Venet, D., Dumont, J.E. & Detours, V. Most Random Gene Expression Signatures Are  
634 Significantly Associated with Breast Cancer Outcome. *PLoS Comput Biol* **7**, e1002240  
635 (2011).
- 636 38. Dueck, H. et al. Deep sequencing reveals cell-type-specific patterns of single-cell  
637 transcriptome variation. *Genome biology* **16**, 122 (2015).
- 638 39. Foldy, C. et al. Single-cell RNAseq reveals cell adhesion molecule profiles in  
639 electrophysiologically defined neurons. *Proceedings of the National Academy of  
640 Sciences of the United States of America* **113**, E5222-5231 (2016).
- 641 40. Paul, A. et al. Transcriptional Architecture of Synaptic Communication Delineates  
642 GABAergic Neuron Identity. *Cell* **171**, 522-539.e520 (2017).
- 643 41. Kluger, Y. et al. Lineage specificity of gene expression patterns. *Proceedings of the  
644 National Academy of Sciences of the United States of America* **101**, 6508-6513 (2004).
- 645 42. He, M. et al. Strategies and Tools for Combinatorial Targeting of GABAergic Neurons in  
646 Mouse Cerebral Cortex. *Neuron* **91**, 1228-1243 (2016).
- 647 43. Li, J. et al. Single-cell transcriptomes reveal characteristic features of human pancreatic  
648 islet cell types. *EMBO reports* **17**, 178-187 (2016).
- 649 44. Xin, Y. et al. RNA Sequencing of Single Human Islet Cells Reveals Type 2 Diabetes  
650 Genes. *Cell metabolism* **24**, 608-615 (2016).
- 651 45. Lin, C., Jain, S., Kim, H. & Bar-Joseph, Z. Using neural networks for reducing the  
652 dimensions of single-cell RNA-Seq data. *Nucleic acids research* (2017).
- 653 46. Kiselev, V.Y. & Hemberg, M. scmap - A tool for unsupervised projection of single cell  
654 RNA-seq data. *bioRxiv* (2017).
- 655 47. Welch, J.D., Hartemink, A.J. & Prins, J.F. MATCHER: manifold alignment reveals  
656 correspondence between single cell transcriptome and epigenome dynamics. *Genome  
657 biology* **18**, 138 (2017).
- 658 48. Peña-Castillo, L. et al. A critical assessment of Mus musculus gene function prediction  
659 using integrated genomic evidence. *Genome biology* **9**, S2-S2 (2008).

- 660 49. Lee, I., Ambaru, B., Thakkar, P., Marcotte, E.M. & Rhee, S.Y. Rational association of  
661 genes with traits using a genome-scale gene network for *Arabidopsis thaliana*. *Nature*  
662 *biotechnology* **28**, 149-156 (2010).
- 663 50. Regev, A. et al. The Human Cell Atlas. *bioRxiv* (2017).
- 664 51. [github.com/maggiecrow/MetaNeighbor](https://github.com/maggiecrow/MetaNeighbor) (2016).
- 665 52. Ballouz, S., Verleyen, W. & Gillis, J. Guidance for RNA-seq co-expression network  
666 construction and analysis: safety in numbers. *Bioinformatics (Oxford, England)* **31**, 2123-  
667 2130 (2015).
- 668 53. Ballouz, S., Weber, M., Pavlidis, P. & Gillis, J. EGAD: ultra-fast functional analysis of  
669 gene networks. *Bioinformatics (Oxford, England)* (2016).
- 670 54. Fisher, R.A. Statistical methods for research workers. (Oliver and Boyd, Edinburgh,  
671 London,; 1925).
- 672 55. Benjamini, Y. & Hochberg, Y. Controlling the False Discovery Rate: A Practical and  
673 Powerful Approach to Multiple Testing. *Journal of the Royal Statistical Society. Series B*  
674 *(Methodological)* **57**, 289-300 (1995).
- 675

## Figures

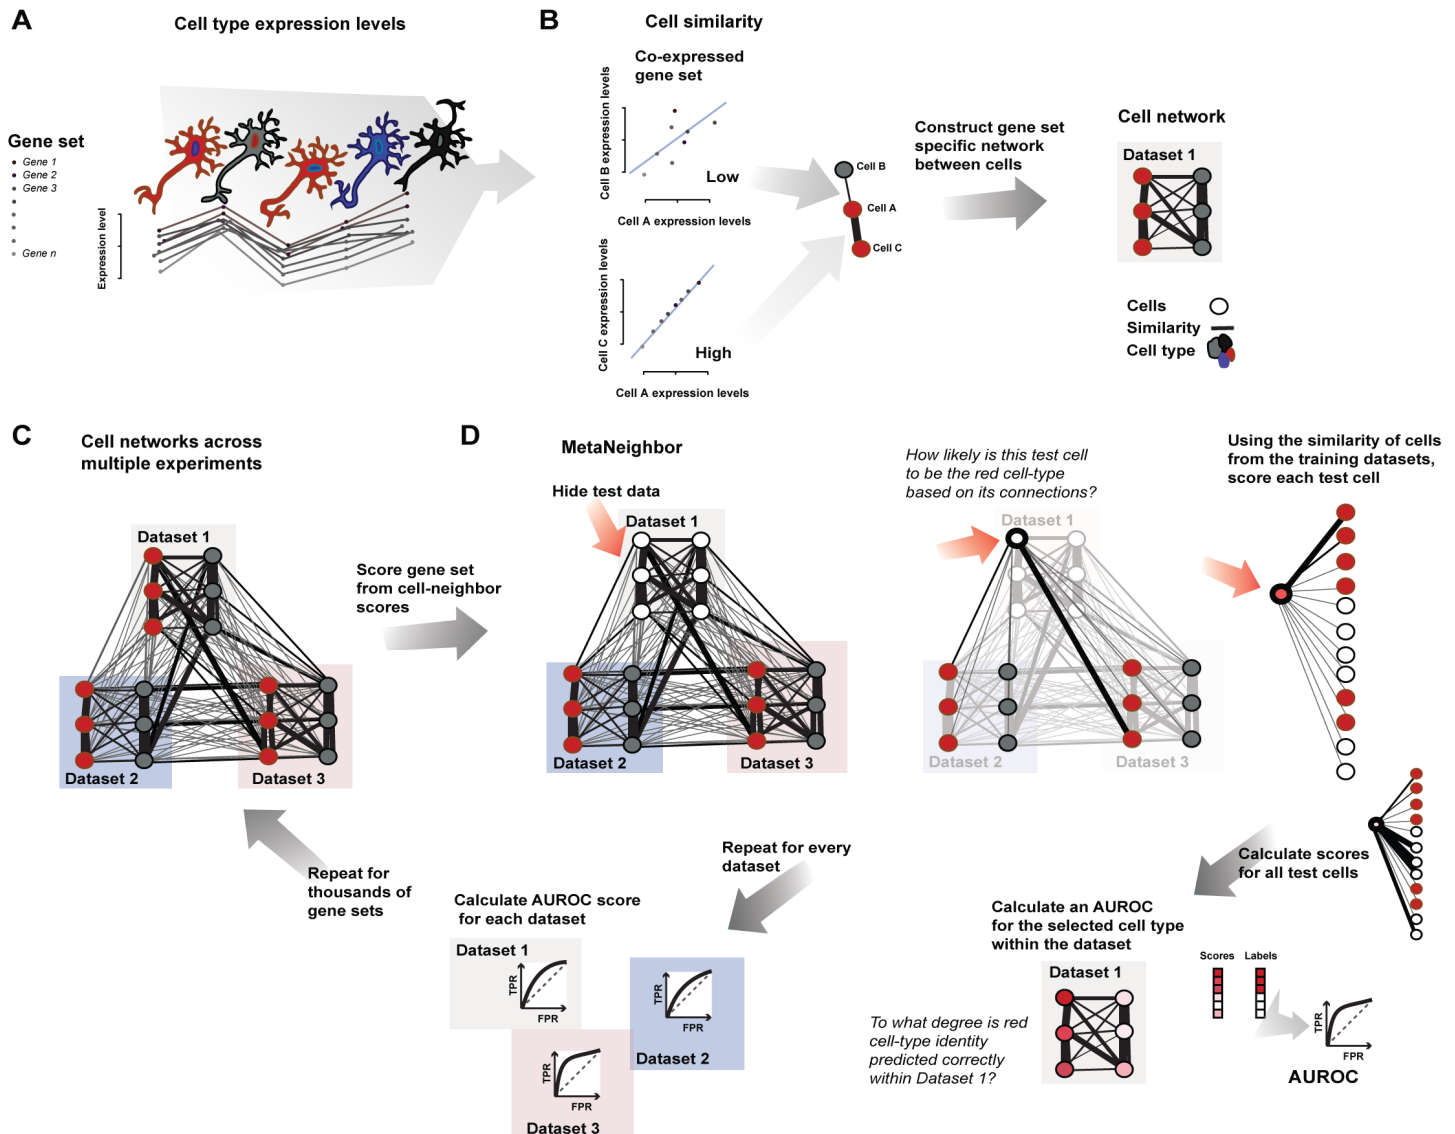

### Figure 1 – MetaNeighbor quantifies cell type identity across experiments

**A** – Schematic representation of gene set co-expression across individual cells. Cell types are indicated by their color. **B** – Similarity between cells is measured by taking the correlation of gene set expression between individual cells. On the top left of the panel, gene set expression between two cells, A and B, is plotted. There is a weak correlation between these cells. On the bottom left of the panel we see the correlation between cells A and C, which are strongly correlated. By taking the correlations between all pairs of cells we can build a cell network (right), where every node is a cell and the edges represent how similar each cell is to each other cell. **C** - The cell network that was generated in B can be extended to include data from multiple experiments (multiple datasets). The generation of this multi-dataset network is the first step of MetaNeighbor. **D** – The cross-validation and scoring scheme of MetaNeighbor is demonstrated in this panel. To assess cell type identity across experiments we use neighbor voting in cross-validation, systematically hiding the labels from one dataset at a time for testing. Cells within the test set are predicted as similar to the cell types from other training sets using a neighbor voting formalism. Whether these scores prioritize cells as the correct type within the dataset determines the performance, expressed as the AUROC. In other words, comparative assessment of cells occurs only within a dataset, but is based only on training information from outside that dataset. This is then repeated for all gene sets of interest.

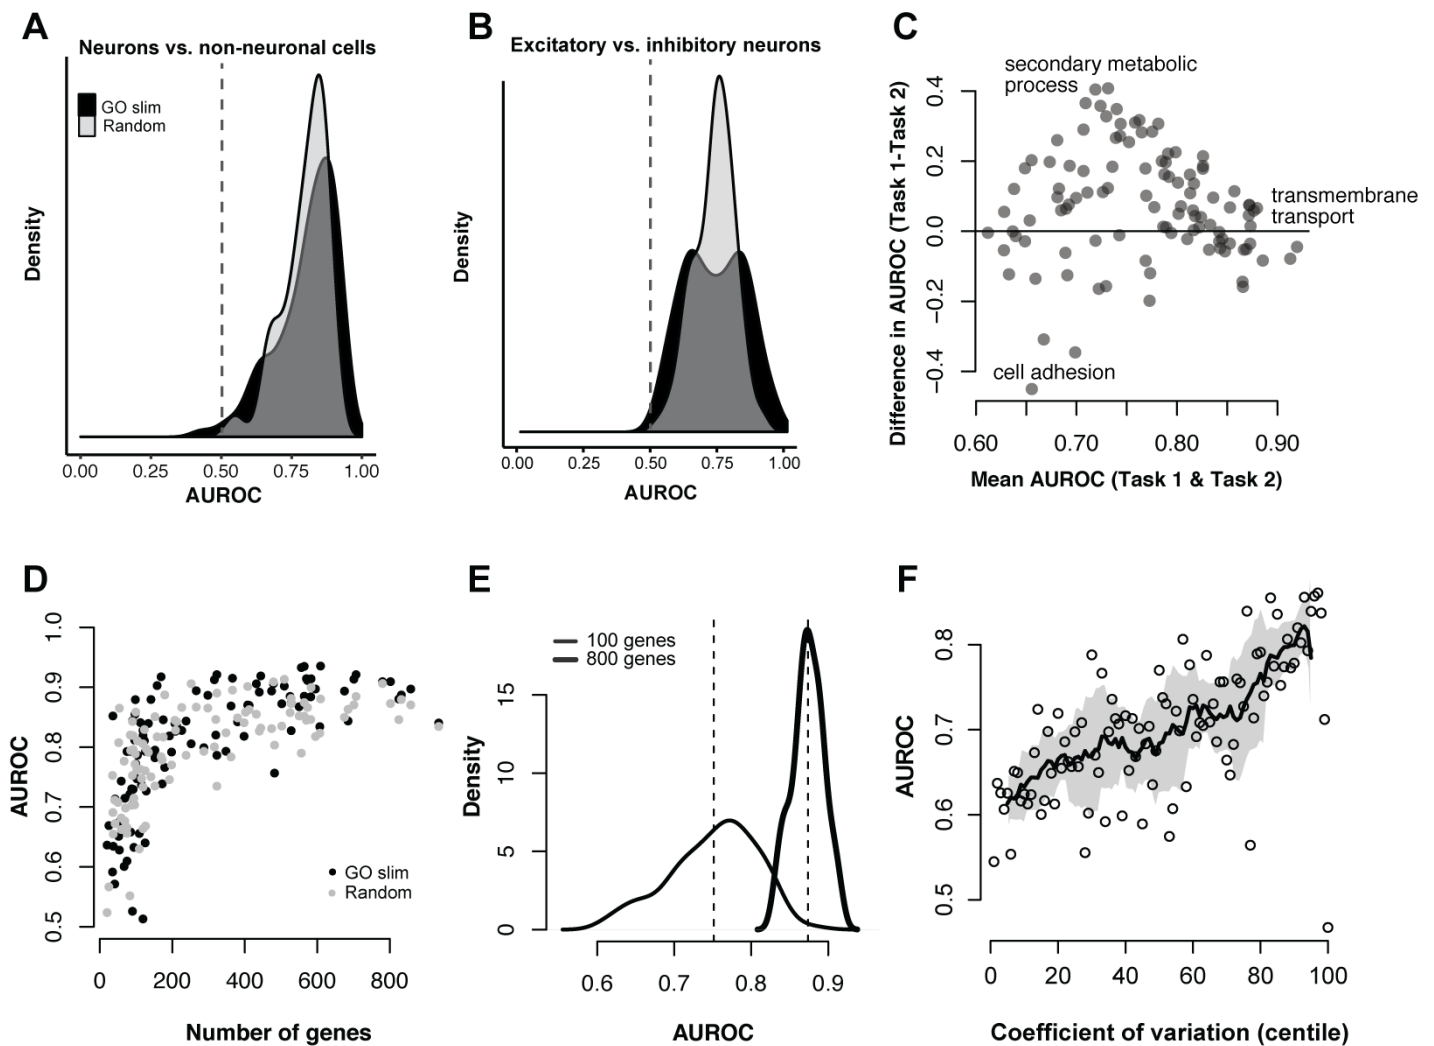

### Figure 2 – Cell type identity is widely represented in the transcriptome

**A & B** – Distribution of AUROC scores from MetaNeighbor for discriminating neurons from non-neuronal cells (“task one”, A) and for distinguishing excitatory vs. inhibitory neurons (“task two”, B). GO scores are in black and random gene set scores are plotted in gray. Dashed grey lines indicate the null expectation for correctly guessing cell identity (AUROC=0.5). For both tasks, almost any gene set can be used to improve performance above the null, suggesting widespread encoding of cell identity across the transcriptome. **C** – Comparison of GO group scores across tasks. GO groups at the extremes of the distribution are labeled. Most gene sets have higher performance for Task one, and a number of groups have high performance for both tasks (e.g., transmembrane transport). **D** – Task one AUROC scores for each gene set are plotted with respect to the number of genes. A strong, positive relationship is observed between gene set size and AUROC score, regardless of whether genes were chosen randomly or based on shared functions. **E** – Distribution of AUROC scores for task one using 100 sets of 100 randomly chosen genes, or 800 randomly chosen genes. The mean AUROC score is significantly improved with the use of larger gene sets (mean 100 = 0.80 +/- 0.05, mean 800 = 0.90 +/- 0.03). **F** – Relationship between AUROC score and coefficient of variation. Task one was re-run using sets of genes chosen based on mean coefficient of variation across datasets. A strong positive relationship was observed between this factor and performance ( $r_s \sim 0.67$ ).

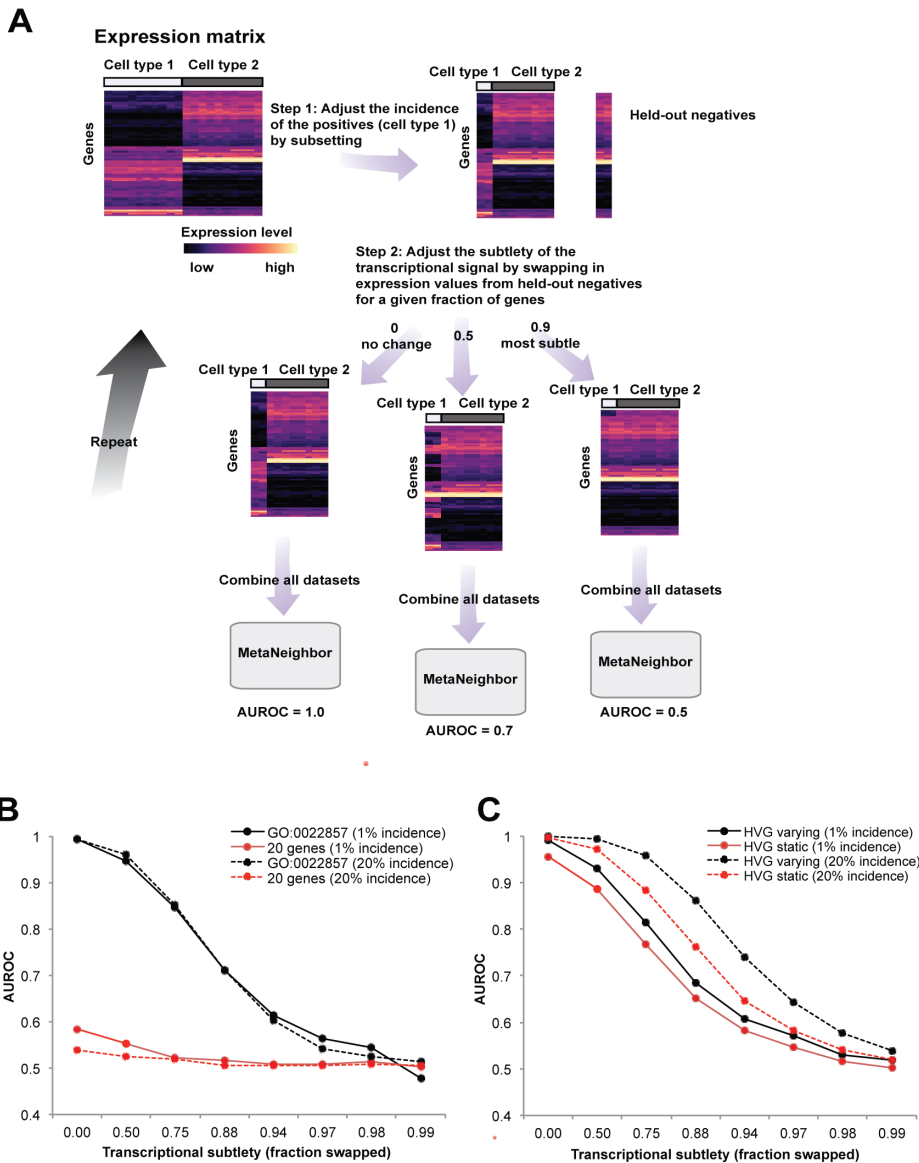

**Figure 3 - Empirical modeling demonstrates that MetaNeighbor readily identifies rare and transcriptionally subtle cell types**

**A** – Schematic of the empirical model. For simplicity only a single dataset is depicted. (Top left) – In this dataset, we begin with an expression matrix containing gene expression levels for two cell types comprising ten cells each. Here we will be assessing the replicability of cell type 1 (‘positives’) relative to cell type 2 (‘negatives’). (Top right) We first adjust cell rarity by randomly sampling subsets of the original expression matrix. In the schematic, incidence is set to 20% (2 positives, 8 negatives). In addition, we partition two negatives from the original data for later use. (Middle) Next, we adjust transcriptional subtlety by randomly sampling genes from a given fraction of the transcriptome. Gene expression in the positives will be replaced with data from the unused negatives, creating a modeled cell type varying from the negative class only in a subset of its genes. (Bottom) All datasets are combined and MetaNeighbor is run to assess the replicability of the positives at each level of rarity and subtlety. **B** – MetaNeighbor results for empirical modeling of excitatory neuron rarity and subtlety, repeated 100 times. Mean performance for the top GO group is in black, performance for 20 randomly chosen genes is shown in red; dashed lines indicate 20% rarity, solid lines show 1% rarity. MetaNeighbor is robust to differences in cell rarity, and can reliably distinguish between types even when they are very similar (AUROC>0.7 at >88% subtlety). **C** – MetaNeighbor results for empirical modeling of excitatory neuron rarity and subtlety using highly variable genes (HVGs), repeated 100 times. Performance for the HVG varying set is shown in black, performance for the HVG static is shown in red; dashed lines indicate 20% rarity, solid lines show 1% rarity. HVGs allow for robust identification of positives even when cells are rare or differences are subtle.

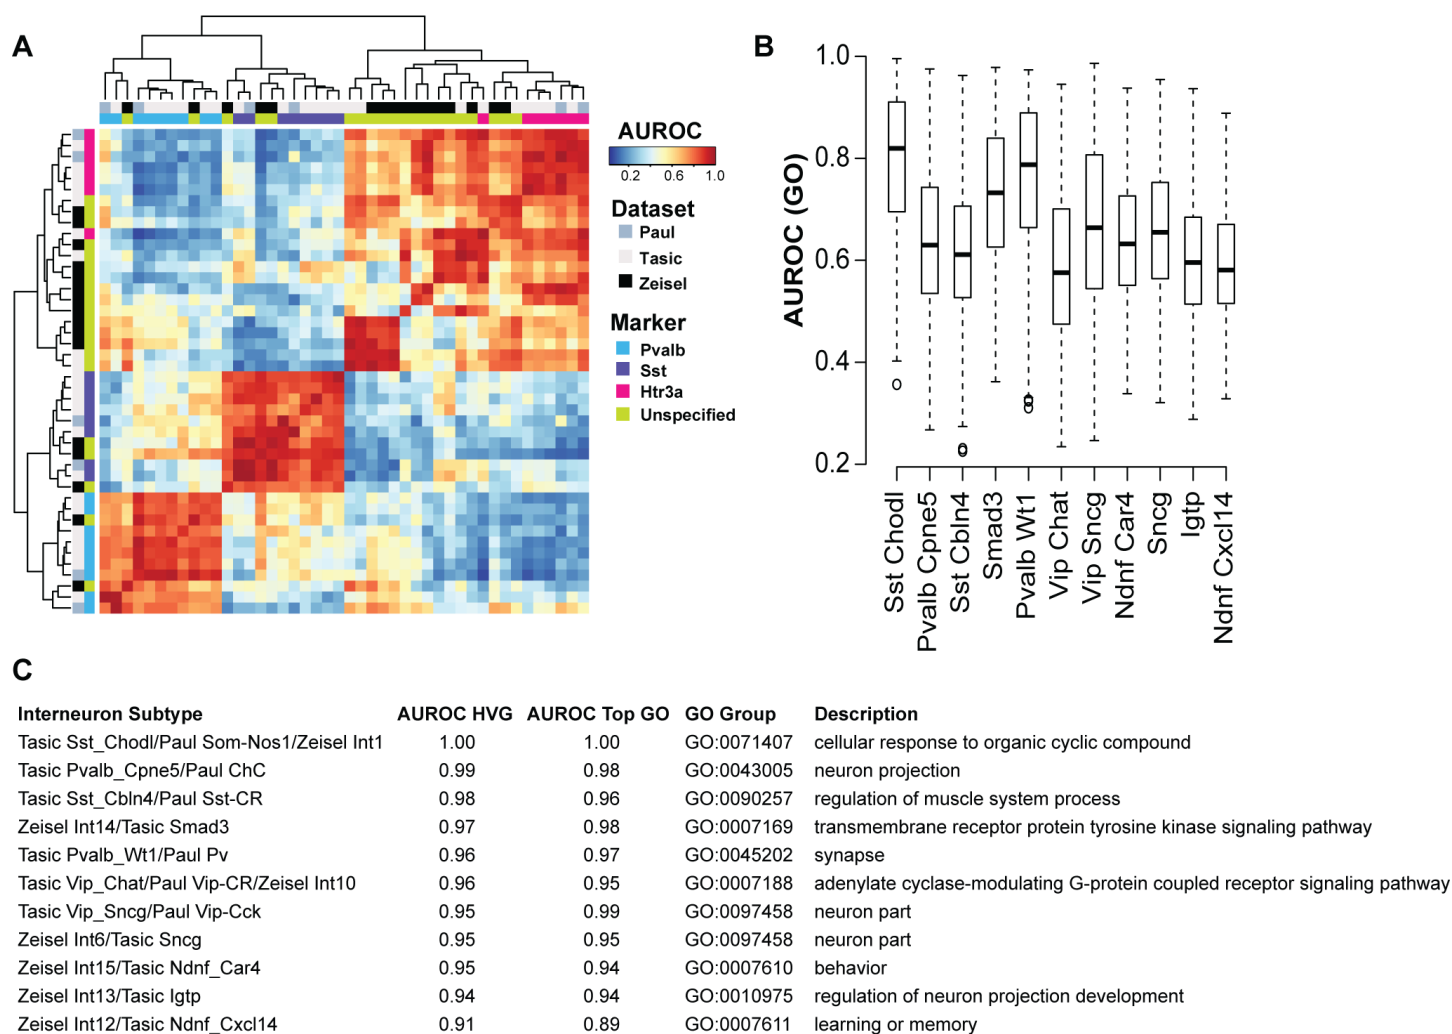

#### Figure 4 – Cross-dataset analysis of interneuron diversity

**A** – Heatmap of AUROC scores between interneuron subtypes based on the highly variable gene set (HVG). Dendrograms were generated by hierarchical clustering of Euclidean distances using average linkage. Row and column colors indicate data origin and marker expression. Clustering of AUROC score profiles recapitulates known cell type structure, with major branches representing the Pv, Sst and Htr3a lineages. **B** - Boxplots of GO performance (3888 sets) for each putatively replicated subtype, ordered by their AUROC score from the highly variable gene set. Subtypes are labeled with the names from Tasic *et al.* A positive relationship is observed between AUROC scores from the highly variable set and the average AUROC score for each subtype. **C** – The table shows the top GO terms for each putatively replicated subtype alongside scores from HVGs. HVGs perform comparably or better than the top ranking GO group for 8/11 subtypes.

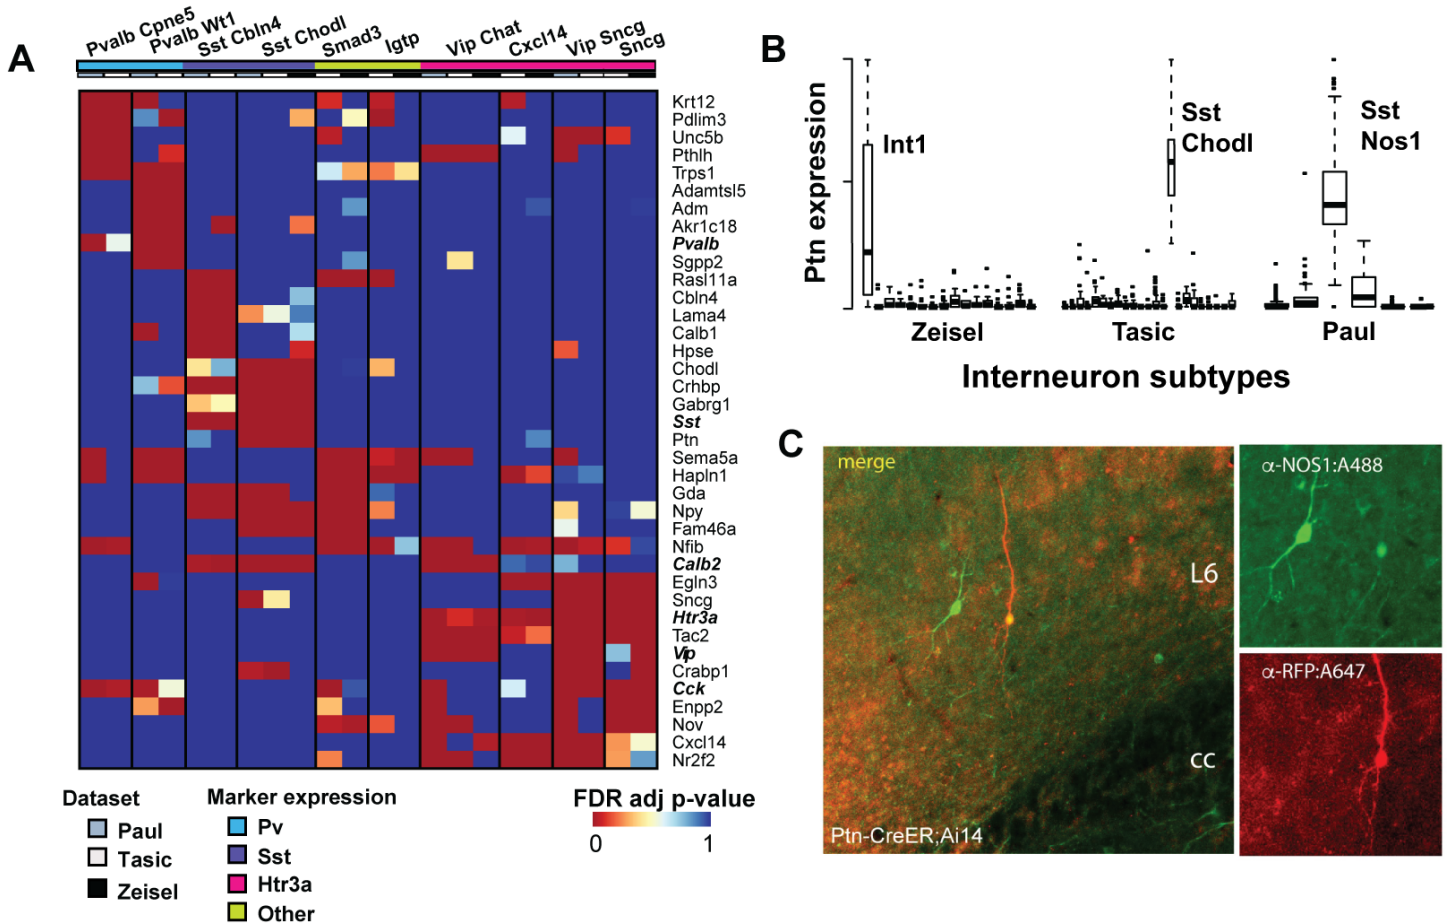

Source: http://biorxiv.org/content/10.1101/150524v2.full.pdf
